# Supplementary material
Source: publisher figshare collection journal article supplement (https://sage.figshare.com/ndownloader/files/13899704)
Supplement: Supplementary file 1 [file 13899704]

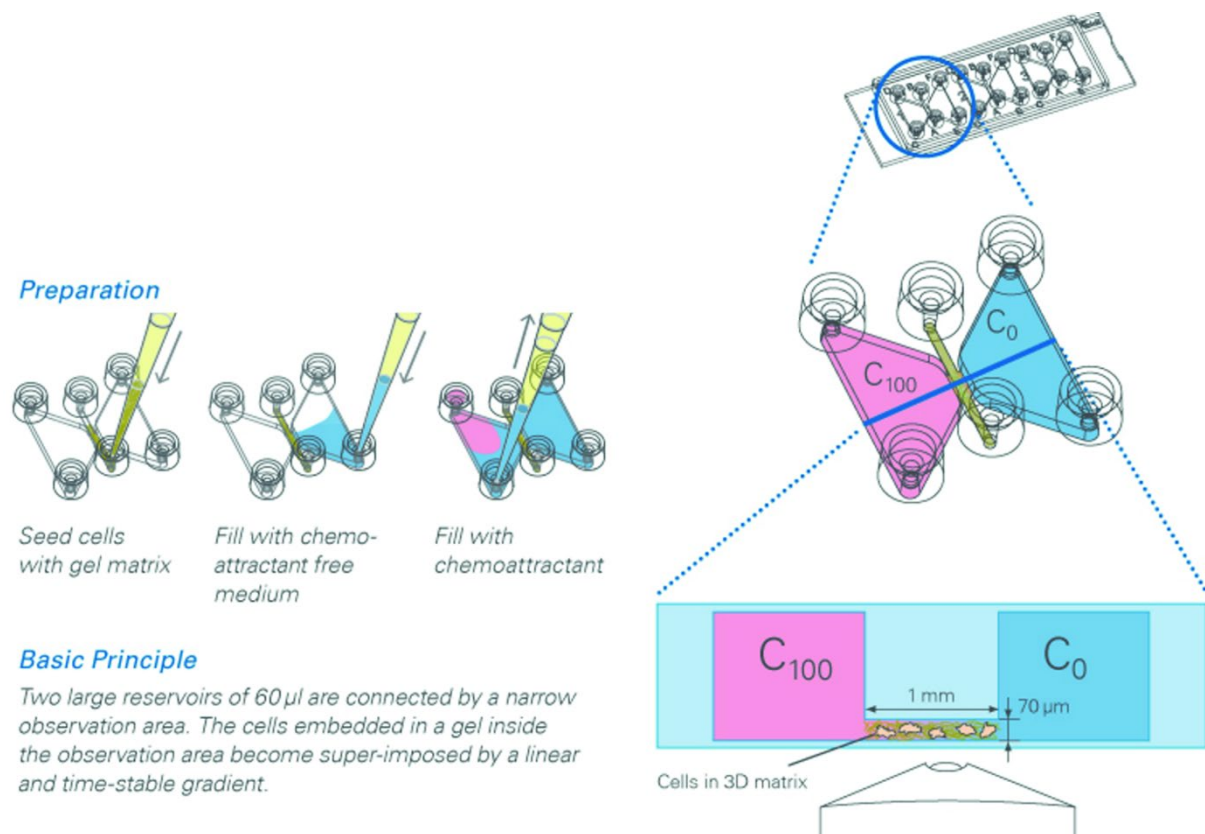

**Figure S1. Description of the experiment setting.** The 3D- $\mu$ -Slide migration chamber consists of three channels with their associated reservoirs. The channels were filled with a gelling cell-collagen-matrix and incubated for 35 min at 37 °C and 5 % CO<sub>2</sub>. After consolidation of the gel, the left reservoir was filled with 60  $\mu$ l either of CA in medium or medium (1640 RPMI with 10 % FCS) alone. The right reservoir was filled with medium alone. After filling, cell movement was observed under a microscope for 180 min with 1 picture taken every minute. The displayed graphic is downloaded from the IBIDI web site

([http://ibidi.com/fileadmin/products/labware/channel\\_slides/S\\_8032X\\_Slide\\_Chemo3D/S\\_8032X\\_Slide\\_Chemo3D\\_image1.jpg](http://ibidi.com/fileadmin/products/labware/channel_slides/S_8032X_Slide_Chemo3D/S_8032X_Slide_Chemo3D_image1.jpg), 22.02.16; 10:35 a.m.).

**Table S1. Parameters for Chemotaxis.**

| Parameter                      | Direction   | Formula                                       |
|--------------------------------|-------------|-----------------------------------------------|
| Centre of Mass (CoM)*, $\mu$ m | $\parallel$ | $xCoM = \frac{1}{n} \sum_{i=1}^n (x_{i,end})$ |
|                                | $\perp$     | $yCoM = \frac{1}{n} \sum_{i=1}^n (y_{i,end})$ |

|                                                                                                                                                                                                                                                                                                                                                                                                                                                                                                                                                                                                                                                                                                                                                                                                                                                                                       |   |                                                                 |
|---------------------------------------------------------------------------------------------------------------------------------------------------------------------------------------------------------------------------------------------------------------------------------------------------------------------------------------------------------------------------------------------------------------------------------------------------------------------------------------------------------------------------------------------------------------------------------------------------------------------------------------------------------------------------------------------------------------------------------------------------------------------------------------------------------------------------------------------------------------------------------------|---|-----------------------------------------------------------------|
| <i>Forward Migration Index (FMI)†</i>                                                                                                                                                                                                                                                                                                                                                                                                                                                                                                                                                                                                                                                                                                                                                                                                                                                 |   | $xFMI = \frac{1}{n} \sum_{i=1}^n \frac{x_{i,end}}{d_{i,accum}}$ |
|                                                                                                                                                                                                                                                                                                                                                                                                                                                                                                                                                                                                                                                                                                                                                                                                                                                                                       | ⊥ | $yFMI = \frac{1}{n} \sum_{i=1}^n \frac{y_{i,end}}{d_{i,accum}}$ |
| <i>Directionality‡</i>                                                                                                                                                                                                                                                                                                                                                                                                                                                                                                                                                                                                                                                                                                                                                                                                                                                                |   | $D = \frac{1}{n} \sum_{i=1}^n \frac{d_{i,euclid}}{d_{i,accum}}$ |
| <i>Mean Velocity</i>                                                                                                                                                                                                                                                                                                                                                                                                                                                                                                                                                                                                                                                                                                                                                                                                                                                                  |   | $V = \frac{1}{n} \sum_{i=1}^n \frac{d_{i,accum}}{\Delta t}$     |
| <p>Parameters measure effects on the cells in direction either parallel (  ) or perpendicular (⊥) to the CA. <math>x_{i,end}</math> and <math>y_{i,end}</math> are the endpoints of each single cell in x- or y-direction. <math>d_{i,accum}</math> describes the accumulated way of each cell; <math>d_{i, Euclid}</math> is the cell's Euclidean way; <math>n \leq 20</math> cells.</p> <p>*The CoM indicates the average displacement of the cells in relation to either the x-direction or the y-direction.</p> <p>†The FMI indicates the direction and efficiency of any movement in either x- or y-direction. Values range from 0 (not effective movement) to 1/-1 (very effective movement).</p> <p>‡Directionality measures the efficiency of any movement without indicating its direction. Values range from 0 (not effective movement) to 1 (very effective movement).</p> |   |                                                                 |

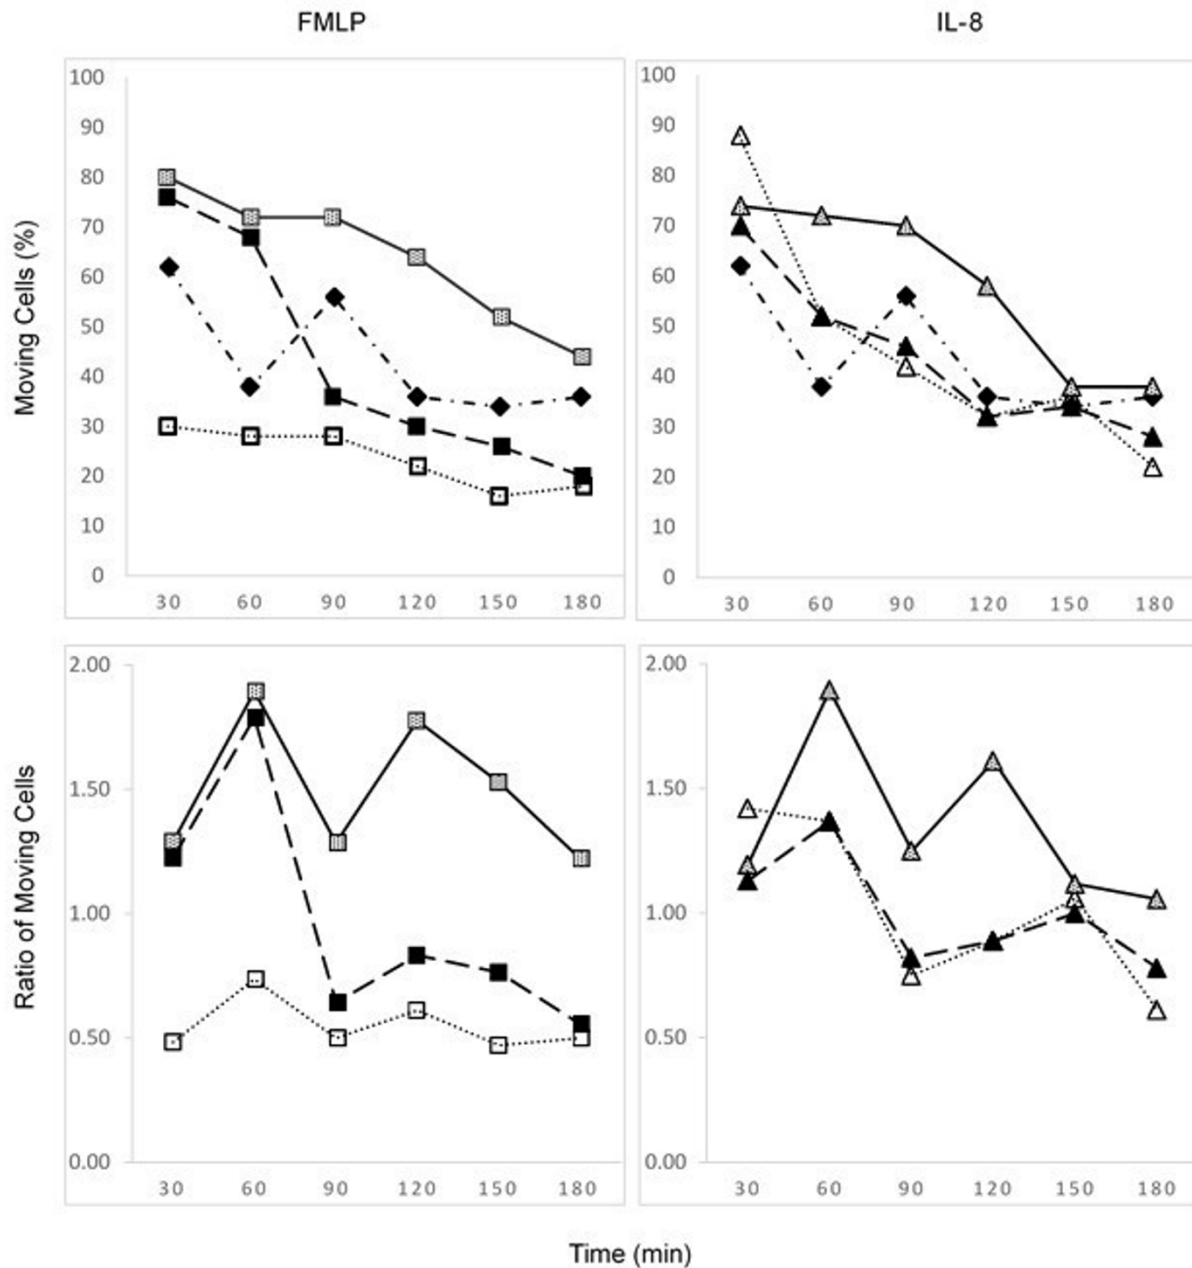

**Figure S2. Moving cells and ratio of moving cells.** The percentage of moving cells (top) and the ratio of moving cells (bottom) are displayed either for FMLP (left) or for IL-8 (right). CA-free cases (◆) as reference for the ratio of moving cells have a constant ratio of 1 and are not displayed in the lower row graphs. Different concentrations of CAs were used: FMLP in 1 (□), 10 (◻) and 100 (■) nM and IL-8 in 1 (Δ), 10 (◻), 100 (▲) nM concentrations. For each concentration of CA and the CA-free cases 5 experiments were performed. The median absolute deviation was in a range from 2.4 – 18.8 %.

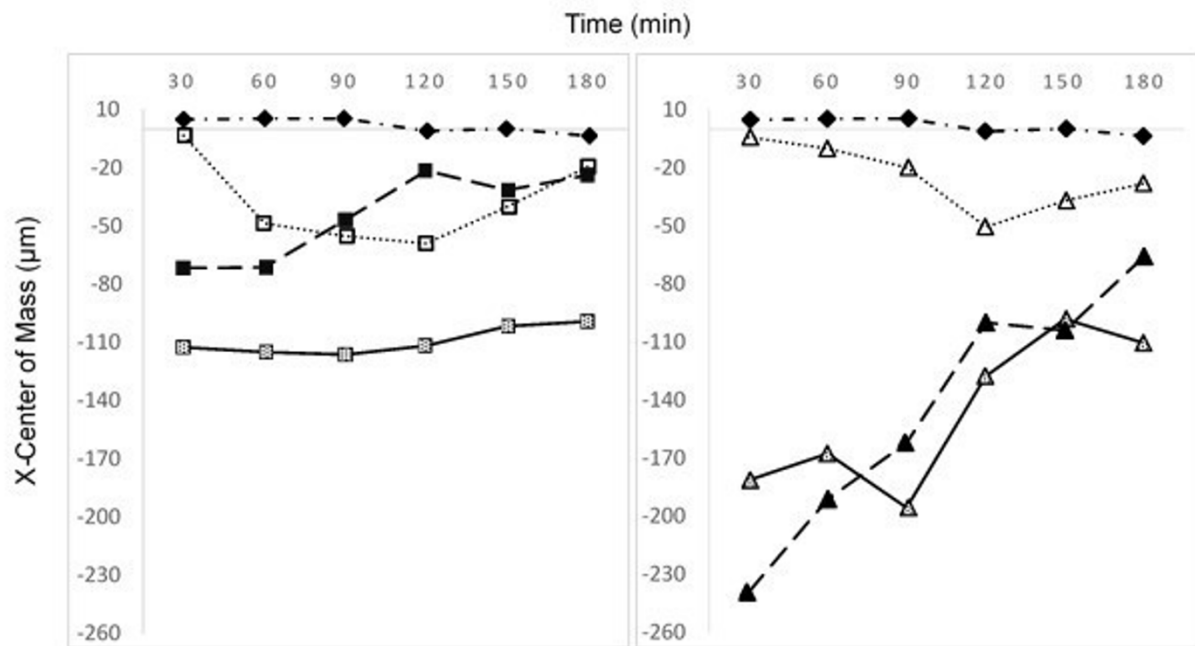

**Figure S3. X-Centre of Mass.** The time course of the xCoM (μm) during observation is displayed for different concentrations of CAs: 1 (□), 10 (▣) and 100 (■) nM FMLP (left); 1 (Δ), 10 (▴), 100 (▲) nM of IL-8 (right) and CA-free cases (◆). For each concentration of CA and the CA-free cases 5 experiments were performed. The median absolute deviation was in a range from 1.74 – 60.88 μm.

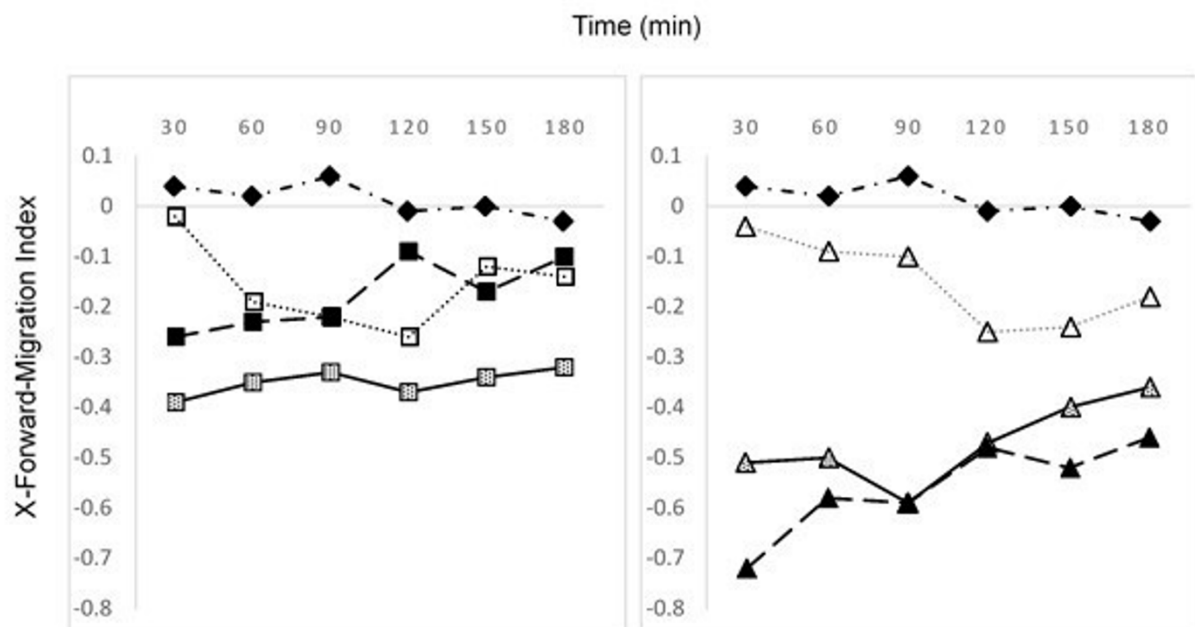

**Figure S4. X-Forward-Migration Index.** The time course of the xFMI during observation is displayed for different concentrations of CAs: 1 (□), 10 (▣) and 100 (■) nM FMLP (left); 1 (Δ), 10 (▴), 100 (▲) nM of IL-8 (right) and CA-free cases (◆). For each concentration of CA and the CA-free cases 5 experiments were performed. The median absolute deviation was in a range from 0.02 – 0.21.

**Table S2. Time course of the Directionality parameter.**

| Time, min | CA, nM  |       |       |       |       |       |       |
|-----------|---------|-------|-------|-------|-------|-------|-------|
|           | Without | FMLP  |       |       | IL-8  |       |       |
|           |         | 1     | 10    | 100   | 1     | 10    | 100   |
| 0–30      | 0.20    | 0.40  | 0.45  | 0.37  | 0.43  | 0.57* | 0.75* |
| 30–60     | 0.25    | 0.38  | 0.45  | 0.37  | 0.48* | 0.55* | 0.66* |
| 60–90     | 0.21    | 0.44* | 0.45* | 0.35* | 0.37* | 0.63* | 0.61* |
| 90–120    | 0.17    | 0.40  | 0.46  | 0.28  | 0.38* | 0.50* | 0.53* |
| 120–150   | 0.22    | 0.36  | 0.42  | 0.34  | 0.41* | 0.55* | 0.57* |
| 150–180   | 0.24    | 0.40* | 0.45* | 0.34  | 0.34  | 0.45* | 0.53* |
| Average   | 0.22    | 0.40  | 0.45  | 0.34  | 0.39  | 0.55  | 0.58  |

The median standard deviation was in a range from 0.01 – 0.10.

\*Value is significant ( $P < .05$ ) different from corresponding value in cases without CA.
